# Supplementary figures and images for: Silica supported ceria nanoparticles: a hybrid nanostructure to increase stability and surface reactivity of nano-crystalline ceria
Source: Royal Society of Chemistry journal article supplement (doi:10.1039/c3ra44345k), 2013-11-21

**Supplementary Information:**

S1: TEM image of control unstabilized ceria nanoparticles.

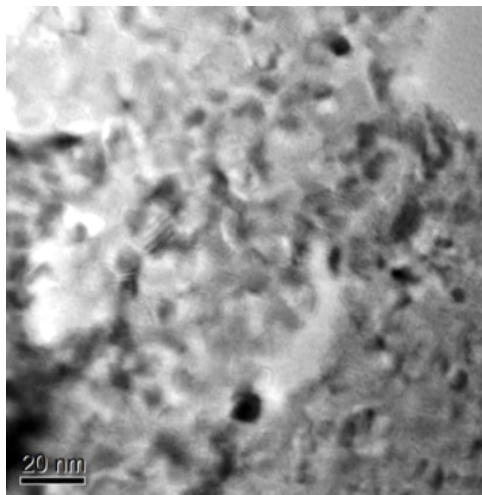

Supplement: c3ra44345k.pdf [file c3ra44345k.pdf]
